1  
2  
3  
4  
5  
6  
7  
8  
9  
10  
11  
12  
13  
14  
15  
16  
17  
18  
19  
20

# Multiplexed detection, partitioning, and persistence of wild type and vaccine strains of measles, mumps, and rubella viruses in wastewater

Jingjing Wu<sup>1</sup>, Michael X. Wang<sup>2</sup>, Prashant Kalvapalle<sup>1</sup>, Michael Nute<sup>3</sup>, Todd J. Treangen<sup>2,3</sup>, Katherine Ensor<sup>4</sup>, Loren Hopkins<sup>5</sup>, Rachel Poretsky<sup>6</sup>, and Lauren B. Stadler<sup>1</sup>

## Author affiliations:

1. Department of Civil and Environmental Engineering, Rice University, Houston, TX, 77005
2. Department of Bioengineering, Rice University, Houston, TX, 77005
3. Department of Computer Science, Rice University, Houston, TX, 77005
4. Department of Statistics, Rice University, Houston, TX, 77005
5. Houston Health Department, 8000 N. Stadium Dr., Houston, TX, 77054
6. Department of Biological Sciences, University of Illinois Chicago, Chicago, IL, 60607

\*To whom correspondence should be addressed: Lauren B. Stadler, [lauren.stadler@rice.edu](mailto:lauren.stadler@rice.edu)

21 **Keywords:** wastewater-based epidemiology, measles, mumps, rubella, vaccine-preventable,  
22 ddPCR

23 **Abstract**

24 Wastewater surveillance of vaccine-preventable diseases may provide early warning of outbreaks  
25 and identify areas to target for immunization. To advance wastewater monitoring of measles,  
26 mumps, and rubella viruses, we developed and validated a multiplexed RT-ddPCR assay for the  
27 detection of their RNA. Because the measles-mumps-rubella (MMR) vaccine is an attenuated  
28 live virus vaccine, we also developed an assay that distinguishes between wild-type and vaccine  
29 strains of measles in wastewater and validated it using a wastewater sample collected from a  
30 facility with an active measles outbreak. We also evaluated the partitioning behavior the viruses  
31 in between the liquid and solid fractions of influent wastewater. We found that assaying the  
32 liquid fraction of the wastewater resulted in more sensitive detection of the viruses despite the  
33 fact that the viral RNA was enriched in the solid fraction due to the low solids content of the  
34 influent wastewater. Finally, we investigated the stability of measles, mumps, and rubella RNA  
35 in wastewater samples spiked with viruses over 28 days at two different concentrations and two  
36 temperatures (4°C and room temperature) and observed limited viral decay. Our study supports  
37 the feasibility of wastewater monitoring for measles, mumps, and rubella viruses for population-  
38 level surveillance.

## 39 **1. Introduction**

40 Wastewater monitoring is a powerful tool for infectious disease surveillance that has been  
41 used to inform targeted public health interventions. Numerous use cases for how wastewater  
42 monitoring has been used by public health officials for decision-making have been demonstrated,  
43 including as an early warning system that can indicate disease trends and hospitalizations before  
44 other surveillance data (e.g. clinical testing)<sup>1-7</sup>, as a source of information on disease trends  
45 where there is limited case data<sup>6,8-11</sup>, and as a tool for detecting localized outbreaks within  
46 communities<sup>12-21</sup> and facilities<sup>22-31</sup>. Another important use case for wastewater monitoring is to  
47 detect vaccine-preventable diseases and direct immunization resources. For example, SARS-  
48 CoV-2 and influenza wastewater monitoring at preK-12 schools has been used to decide where  
49 and when to provide community immunization events<sup>31</sup>. Another example is the use of  
50 wastewater monitoring for poliovirus as part of the Global Polio Eradication Initiative to inform  
51 polio eradication efforts.

52 Measles is an extremely contagious virus that is vaccine-preventable. It often presents as  
53 a rash and can result in complications in unvaccinated individuals including encephalitis and  
54 death. In 2022, measles infections caused an estimated 136,000 deaths worldwide, primarily  
55 unvaccinated and under vaccinated children<sup>32</sup>. In the U.S., measles was declared eliminated in  
56 2000, thanks to a highly effective vaccination program. However, measles cases in the U.S. are  
57 on the rise, and in 2024 alone, as of April, 2024 a total of 125 cases have been reported in 18  
58 states. Vaccination rates for measles, administered as the measles-mumps-rubella (MMR)  
59 vaccine, have decreased among school-aged children below the 95% coverage rate needed for  
60 herd immunity. The Centers for Disease Control and Prevention (CDC) estimates that over 61  
61 million MMR vaccine doses were postponed or missed between 2020 and 2022 due to COVID-

62 19 delays. With measles activity on the rise globally, cases arising from contact with an  
63 unvaccinated person abroad or visitors can result in transmission in under-vaccinated populations  
64 in the US.

65 Wastewater monitoring has been proposed as a promising tool for population-level  
66 monitoring of measles, mumps, and rubella, but methods for their detection and knowledge of  
67 their stability in wastewater are limited. Previous studies have shown that measles, mumps, and  
68 rubella were detected in urine of infected patients<sup>33-36</sup>, and measles and rubella can be detected  
69 in wastewater<sup>37-40</sup>. One challenge in measles, mumps, and rubella wastewater detection is that  
70 the MMR vaccine is an attenuated (weakened) live virus vaccine. Vaccinated individuals also  
71 shed vaccine virus in their urine<sup>41,42</sup>, and the measles virus has been detected in urine between 1  
72 and 14 days after vaccination in healthy children<sup>43</sup>. Thus, methods are needed that can  
73 distinguish between wild type and vaccine strains in order to differentiate between an outbreak  
74 and vaccination event. Further, research is needed to understand the fate of measles, mumps, and  
75 rubella viruses and their genetic markers in wastewater, including understanding their  
76 partitioning behavior (solid/liquid distribution) and decay in wastewater matrices. This  
77 information is critical for optimizing wastewater sampling and storage, as well as laboratory  
78 detection methods.

79 In this study, we developed and validated a multiplexed reverse transcription-droplet  
80 digital PCR (RT-ddPCR) assay for the detection of measles, mumps, and rubella viral RNA in  
81 wastewater. For measles, we also developed and validated assays that distinguish between wild-  
82 type strains (genotypes D8 and B3, which are the current dominant circulating lineages) and  
83 vaccine strains. We performed experiments to evaluate the partitioning and concentration of the  
84 viruses in the liquid versus solid fraction of influent wastewater samples. Finally, we

85 characterized the persistence of measles, mumps, and rubella RNA in wastewater samples spiked  
86 with viruses over 28 days at two different concentrations and two temperatures (4°C and room  
87 temperature).

## 88 **2. Materials and Methods**

### 89 **2.1. Assay development for measles, mumps and rubella viruses**

90 We designed two different assays for wild type measles (WT1 and WT2), an assay for the  
91 measles vaccine strain (VA), an assay for mumps virus, and an assay for rubella virus. Assay  
92 details for measles, mumps, and rubella are provided in SI 1.1. All the measles assays use the  
93 same forward and reverse primers, but different probe sequences. The mumps and rubella virus  
94 assays do not distinguish between wild type and vaccine strains. For measles virus, the assay  
95 design focused on the detection of the dominant measles genotypes (D8 and B3) of the current  
96 outbreak. We multiplexed the WT1, mumps, and rubella assays and validated them (section 2.3).  
97 We also compared WT1, WT2, and VA assays in their ability to distinguish between wild type  
98 and vaccine strains of measles. Compared to the WT1 probe, which has only one mismatch to the  
99 Edmonston vaccine strains, the WT2 probe sequence has 2 to 3 mismatches to vaccine strains.  
100 The WT2 probe also perfectly matches the D8 strain and has only 1 mismatch to the B3 strain  
101 (Table SI.8). We duplexed the measles WT2 and VA assays and validated them as described in  
102 section 2.3.

103 For measles, we also designed primers for Sanger sequencing based on the same multiple  
104 sequence alignment (MSA) described in SI 1.1. A consensus sequence was generated within a  
105 conserved region at the head of the L gene and the primers were designed with Primer3Plus  
106 (settings in SI 1.1). To analyze measles Sanger sequencing results, a consensus sequence was  
107 generated based on the output sequences of 6 Sanger sequencing replicates (3 forward and 3

108 reverse). The consensus was then input to NCBI BLAST+<sup>44</sup> (version 2.15.0, blastn was selected  
109 for search algorithm, other parameters were kept as default) against all measles sequences (NCBI  
110 taxonomy ID 11234) in the nucleotide collection (nt/nr) database (version Apr. 25, 2024), and  
111 822 hits were found. An MSA was generated with MAFFT<sup>45</sup> (version 7, default parameters),  
112 based on selected BLAST hits to represent each measles genotype, as well as the Sanger  
113 consensus. A phylogenetic tree was generated and plotted with iTOL<sup>46</sup>.

## 114 **2.2. Wastewater sample collection and target viral RNA quantification**

115 Composite influent wastewater samples were collected using a refrigerated time-  
116 weighted autosampler from the influent channel of wastewater treatment plants (WWTPs) in  
117 Houston between March 4 and April 15, 2024 as described previously<sup>47</sup>. Influent samples from  
118 the top 10 largest WWTPs (by population) were mixed together and used for assay validation,  
119 evaluation of the recovery rates of measles, mumps, and rubella viral RNA in wastewater liquid  
120 and solid fractions, and viral RNA persistence experiments.

121 Grab samples collected from a manhole located outside of a facility with an ongoing  
122 outbreak were used for measles assay validation. The first confirmed case in the facility was  
123 identified on March 7, 2024 and the wastewater samples were collected on March 22 and March  
124 30, 2024. The wastewater samples were frozen at -20°C before being shipped overnight to Rice  
125 University on ice. Samples were stored at 4°C upon receipt and processed within 24 hours.

126 Wastewater liquid and solid fractions were separated and concentrated as described in SI  
127 1.2. The nucleic acid extraction was performed using Chemagic<sup>TM</sup> Prime Viral DNA/RNA 300  
128 Kit H96 (Chemagic, CMG-1433, PerkinElmer) and the concentrations of target viral RNA were  
129 quantified using one-step RT-ddPCR Advanced Kit for Probes (1864021, Bio-Rad) (detailed in  
130 SI 1.2). Primer and probe sequences for each assay used in this study, RT-ddPCR reaction assay

131 composition, and thermal cycler conditions are provided in Tables SI.1-4. We followed the  
132 EMMI Guidelines<sup>48</sup> for quality control and additional information is provided in SI 1.8.

### 133 **2.3. Measles, mumps, and rubella RT-ddPCR assay validation**

134 We validated the measles, mumps, and rubella RT-ddPCR assays using synthetic gblock  
135 DNA gene fragments (Integrated DNA Technologies, Coralville, LA, USA), and then using  
136 ATCC viral standards, including the Edmonston strain measles virus (VR-24, ATCC), B3 strain  
137 measles virus (VR-1981, ATCC), mumps virus (VR-106, ATCC), and rubella virus (VR-1359,  
138 ATCC) (Figure SI.1). The ATCC viral standards were heat-lysed at 95°C for 10 minutes using  
139 C1000 Touch™ Thermal Cycler (1851197, Bio-Rad) before quantification via RT-ddPCR.  
140 Assays were performed in singleplex and multiplex to ensure there were no interactions between  
141 primers and probes that would impact quantification results (Figure SI.2 and Table SI.9). A t-test  
142 was used to compare the viral RNA concentrations determined using the singleplex and  
143 multiplex assays.

144 To further validate the multiplexed measles (WT1), mumps, and rubella assay, a mixture  
145 of the Edmonston strain measles virus, mumps virus, and rubella virus standards were serially  
146 diluted and spiked into 50 mL of influent wastewater. In addition, we also verified that the  
147 measles WT1, WT2, and VA assays could distinguish between wild-type and vaccine strains in  
148 wastewater using wastewater samples spiked with the B3 and Edmonston measles strains. For  
149 this experiment, we compared (1) unspiked wastewater samples, (2) wastewater spiked with B3  
150 strain, (3) wastewater spiked with Edmonston strain, and (4) wastewater spiked with both B3 and  
151 Edmonston strains. Each condition was performed in triplicate. The liquid fraction of the spiked  
152 wastewater samples was concentrated using HA filtration, followed by RNA extraction, and  
153 target RNA quantification as described in Section 2.2. We also validated the measles WT2 and

154 VA assays using wastewater samples collected from a manhole outside of a facility with a  
155 confirmed outbreak of measles. These samples were shipped from Chicago, IL to Rice  
156 University and processed as described above.

157       Amplification of a 437 bp region of the measles genome was performed and sequenced  
158 for confirmation and genotyping. Briefly, the RNA extracts from select measles-positive facility  
159 wastewater samples were used as template in RT-PCR using the SuperScript™ IV One-Step RT-  
160 PCR System (12594025, Invitrogen) with primers for Sanger sequencing (Table SI.5) and  
161 following the manufacturer's protocol. RT-PCR reaction assay composition and thermal cyclers  
162 conditions are provided in Tables SI.6-7. The RT-PCR products were visualized with gel  
163 electrophoresis and purified using the Monarch DNA gel extraction kit (T1020S, NEB)  
164 following the manufacturer's instructions. The purified cDNA was diluted to 1 ng/μL and  
165 submitted for Sanger sequencing (GeneWiz, Inc.). The sequencing results were used to  
166 determine the measles genotype as described in section 2.1.

#### 167 **2.4. Detection of measles, mumps, and rubella RNA in wastewater liquid and solid fractions**

168       We compared the concentrations of the measles, mumps, and rubella RNA detected in the  
169 wastewater liquid and solid fractions by spiking Edmonston strain measles virus (VR-24,  
170 ATCC), mumps virus (VR-106, ATCC), and rubella virus (VR-1359, ATCC) into influent  
171 wastewater at a target concentration of 10<sup>7</sup> copies/L-wastewater of each virus. The ATCC virus  
172 standards were first diluted and then spiked into 6 replicate wastewater samples. After spiking  
173 the virus standards, the wastewater samples were inverted to mix and sat at 4°C for 10 minutes,  
174 following a previously published procedure (Breadner et al. 2023). After, the wastewater  
175 samples were aliquoted into 50 mL tubes and centrifuged to separate liquid and solid fractions,



176 as described in section 2.3. Six unspiked wastewater samples were processed in parallel as  
177 negative controls.

178 We calculated the partition coefficient ( $K_d$ ) of measles, mumps, and rubella viral RNA in  
179 influent samples as the ratio of the concentration of viral RNA in the solids (copies/g) divided by  
180 the concentration in the liquid (copies/mL) (SI. Eq 1). We also calculated the recovery rate of  
181 each target virus in the liquid and solid fraction of wastewater (SI. Eq 2). The Mann-Whitney U  
182 test was used to compare the log-transformed measles, mumps, and rubella RNA concentrations  
183 measured in liquid and solid fractions. In addition, we evaluated the presence of inhibitors in the  
184 sample fractions by diluting the RNA extracts 10-fold. We calculated an inhibition factor as the  
185 concentration of viral RNA based on 10x diluted extracts divided by the concentration of viral  
186 RNA from the undiluted extracts (SI. Eq 3).

## 187 **2.5. Measles mumps, and rubella RNA persistence in wastewater**

188 Persistence experiments were performed by spiking the Edmonston strain measles virus  
189 (VR-24, ATCC), mumps virus (VR-106, ATCC), and rubella virus (VR-1359, ATCC) into 400  
190 mL of influent wastewater. Three replicate 400 mL-aliquots were placed in four different  
191 conditions for 28 days. We included two different target initial concentrations of each virus  
192 (“high” of approximately  $10^7$  copies/L-wastewater, and “low” of  $10^6$  copies/L-wastewater), and  
193 incubation at two temperatures (4°C and room temperature). Room temperature was not  
194 controlled but was recorded using a Traceable Temperature/Humidity Bluetooth Data Logger  
195 (6537CC, Traceable). Triplicate unspiked wastewater samples were also stored at the two  
196 temperatures as the negative controls. Samples were collected on days 0, 1, 3, 7, 14, 21, and 28  
197 days for quantification of measles, mumps, and rubella RNA. On each measurement day, we  
198 used a serological pipette to gently mix each sample and collect 50 mL of wastewater from the

199 mid-depth of each sample bottle. The liquid fraction of the samples were used for quantification  
200 and samples were processed as described in section 2.2.

201 A first-order log-linear decay model was used to describe the persistence of each virus.  
202 Viral RNA concentrations were normalized against day 0 concentrations before fitting a linear  
203 regression. We excluded measurement results when no positive droplet was observed in two or  
204 more of the replicates. First-order decay rate constants ( $k$ ) were estimated for each virus for each  
205 different condition (SI. Eq 4-5) and standard errors for each  $k$  based on the triplicates. We also  
206 calculated the  $T_{90}$  for each virus in each condition, which is the time required for the viral RNA  
207 concentration to be reduced by 1 log<sub>10</sub> (90% reduction). A z-test was used to compare the first-  
208 order decay rates determined at the two different initial concentrations, using the mean and  
209 standard error calculated for each decay rate constant and assuming the rates are normally  
210 distributed<sup>49</sup>.

### 211 **3. Results and Discussion**

#### 212 **3.1. Measles, mumps and rubella assay validation**

213 We first validated the mumps, rubella, and measles WT1 multiplex assay using gblock  
214 synthetic gene fragments (Integrated DNA Technologies, Coralville, LA, USA). After  
215 confirming amplification and clear separation of gblock standards, we tested our assay on virus  
216 standards purchased from ATCC. These included the Edmonston strain measles virus (VR-24,  
217 ATCC), mumps virus (VR-106, ATCC), and rubella virus (VR-1359, ATCC) (Figures SI.1). We  
218 again observed clear separation of positive and negative droplets in standards and clean controls.  
219 We also verified that singleplex and multiplex RT-ddPCR assays yielded similar quantitative  
220 results and observed no significant difference between them using both gblocks and ATCC  
221 standards ( $p$ -values  $> 0.1$ ; Figure SI.2 and Table SI.9). Finally, we tested the assays on

222 wastewater samples spiked with the ATCC standards (Figure SI.1). For all the tests, we observed  
223 significant separations between the positive and negative droplets for all the targets based on the  
224 RT-ddPCR results, indicating that the multiplex assay can be used to detect measles, mumps, and  
225 rubella viruses in wastewater.

226         Next, to test whether our WT2 and VA assays could distinguish between wildtype and  
227 vaccine strains of measles, we performed experiments in which we spiked ATCC Edmonston  
228 vaccine and B3 measles virus strains individually and in a mixture into water and wastewater  
229 samples. The RT-ddPCR results showed that the amplitudes of the positive droplets could be  
230 used to distinguish between the detection of the wildtype B3 strain and the vaccine strain (Figure  
231 1B and Table SI.10). Specifically, the amplitude of the wild-type strain was above 5,000 using  
232 the WT2 assay (channel 2) and below 5,000 when using the VA assay (channel 3), and the  
233 amplitude of the vaccine strain was above 6,000 when using the VA assay and below 3,000 when  
234 using the WT2 assay. When both strains were spiked into the wastewater, a clear separation was  
235 observed between the negative droplets, positive droplets corresponding to the wild-type strain,  
236 and positive droplets corresponding to the vaccine strain using both the WT2 and VA assays.  
237 More substantial separation between wild-type and vaccine-positive droplet clusters was  
238 observed with the WT2 assay than the VA assay.

239         In addition to validating the assays with standards spiked into wastewater, we obtained a  
240 sample collected from a manhole located outside a facility with an ongoing measles outbreak. In  
241 these samples, the measles-positive droplets had an amplitude over 6,000 using the WT2 assay  
242 and an amplitude less than 2,500 using the VA assay, indicative that the sample contained the  
243 wild-type measles strain. We confirmed the detection and genotype of the wildtype strain by  
244 amplifying a region of the genome and performing Sanger sequencing. The Sanger sequencing

245 results indicated that measles detected was most closely related to the D8 measles genotype  
246 (Figure SI.3), which is a dominant circulating strain in the current outbreak.

247 Here, we developed and validated a multiplex ddPCR assay that can detect measles,  
248 mumps, and rubella in wastewater samples. Further, our measles assays distinguish between the  
249 wild type and vaccine strains in wastewater. Using this assay, we were able to detect wild-type  
250 measles in wastewater samples containing endogenous measles RNA from a facility with an  
251 active outbreak (Figure 1C). Existing measles assays have been developed for wastewater  
252 monitoring<sup>40,50-52</sup>. However, these assays are not able to distinguish between wild type and  
253 vaccine strains, which could potentially result in positive detections associated with vaccination  
254 events as opposed to transmission in communities. The current CDC recommended assays for  
255 the detection of measles in clinical samples use one assay to detect all measles strains (inclusive  
256 of wild type and vaccine strains)<sup>51</sup>, and a second assay that targets a different region of the  
257 measles genome to detect vaccine strains only<sup>52</sup>. Thus, to differentiate between a wild type and  
258 vaccine strain in a sample, both assays must be performed. Here, we present ddPCR assays that  
259 can distinguish between wild type and vaccine measles strains by amplitude differentiation. The  
260 WT2 and VAC assays use the same forward and reverse primers, but differ in probe sequence.  
261 The probes were designed to maximize binding affinity difference by placing them at  
262 mismatches between wild type and vaccine strains. This approach has been used widely in  
263 ddPCR assays for detecting single nucleotide polymorphisms (SNPs) in genes associated with  
264 cancer<sup>53,54</sup>.

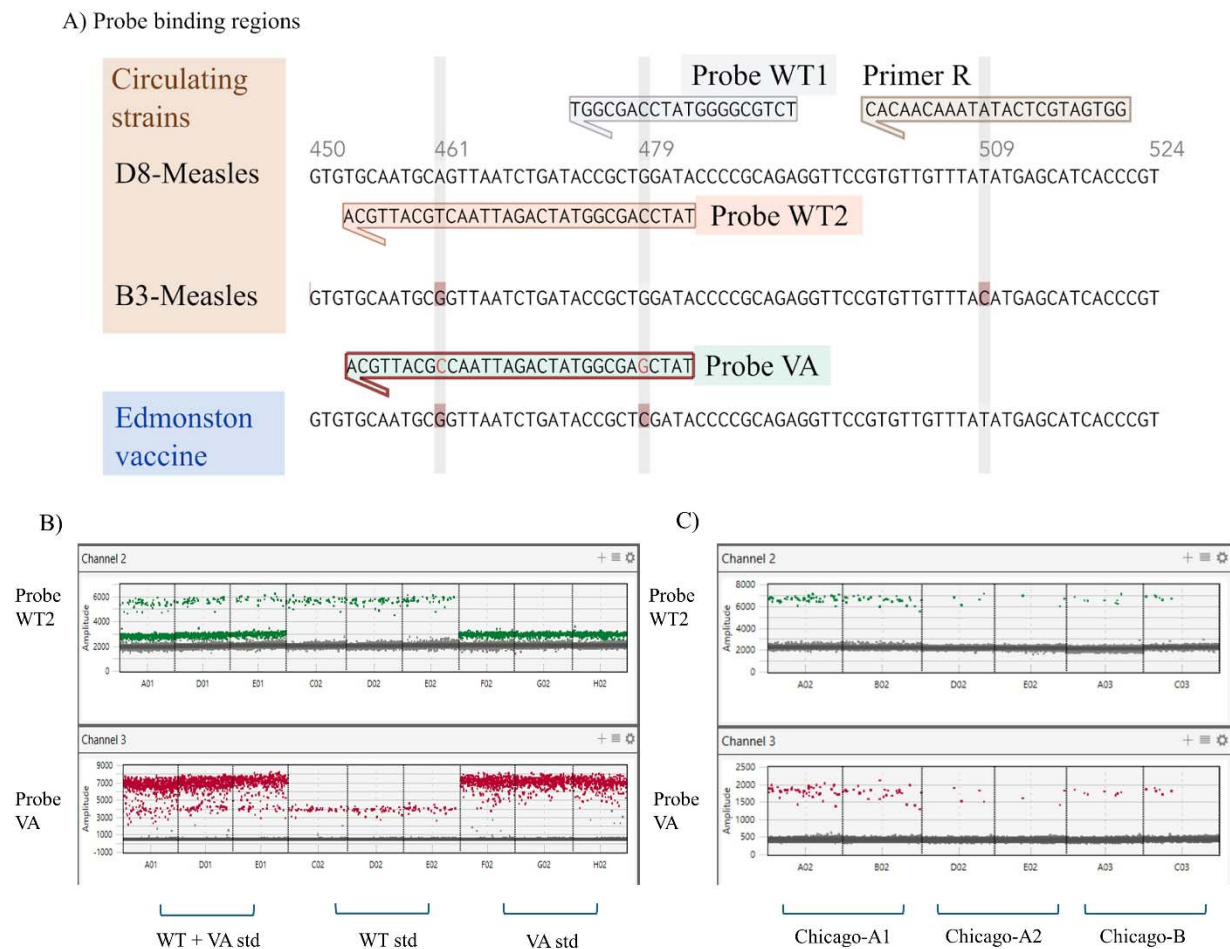

265

266 **Figure 1. Measles assay development and validation.** (A) Alignment of the M gene of measles  
 267 virus genotypes D8, B3, and Edmonston vaccine (VA) strains. Assays for distinguishing between  
 268 wild type (WT) strains (D8 and B3) and vaccine strains used the same forward and reverse  
 269 primers and different probe sequences, shown above the aligned sequences. (B) Validation of the  
 270 WT2 and vaccine assays using ATCC standards spiked into wastewater. ddPCR results for the  
 271 WT2 probe (channel 2, top panel) showed a cluster of positive droplets between 5,000-6,000  
 272 amplitude, corresponding to presence of the WT standard (genotype B3), and a cluster with a  
 273 3,000 amplitude corresponding to the vaccine standard. The VA probe (channel 3, bottom panel)  
 274 showed a positive cluster at 7,000 amplitude corresponding to the VA standard and a positive

275 cluster at 4,000 corresponding to the WT standard. (C) Validation of the WT2 and vaccine  
276 assays using wastewater samples from a facility in Chicago, IL, with an active measles outbreak.  
277 All samples showed positive detections of WT strain, as indicated by the amplitude of the  
278 positive droplets in both the WT assay (channel 2, top panel) and VA assay (channel 3, bottom  
279 panel).

280

### 281 **3.2. Evaluating recovery of measles, mumps, and rubella from liquid and solid fractions of** 282 **influent wastewater samples**

283 To understand how concentration and sample processing methods impacted the detection  
284 of measles, mumps, and rubella in wastewater samples, we quantified viral RNA concentrations  
285 in the liquid and solid fractions of wastewater samples spiked with virus standards. We observed  
286 significantly higher levels of all target RNA in the liquid than the solid fraction of wastewater (p-  
287 values < 0.01; Figure 2A). We also calculated the recovery rate for each target in each fraction of  
288 the wastewater (SI. Eq 2). The concentration of measles in the liquid fraction (supernatant) was  
289  $10^{7.09 \pm 0.18}$  copies/L-wastewater, which corresponded to a recovery rate of  $54.2 \pm 13.4\%$ . In  
290 contrast, the concentration of measles in the solid fraction (pellet) was  $10^{5.88 \pm 0.24}$  copies/L-  
291 wastewater, with a recovery rate of  $3.7 \pm 13.4\%$ . Similar trends of higher concentrations in the  
292 liquid over the solid fraction were observed for mumps and rubella. For mumps, the  
293 concentration in the liquid fraction was  $10^{6.90 \pm 0.17}$  copies/L-wastewater ( $72.8 \pm 24.9\%$  recovery  
294 rate) and  $10^{5.07 \pm 0.30}$  copies/L-wastewater in the solids ( $1.20 \pm 0.68\%$  recovery rate). For rubella,  
295 the liquid concentration was  $10^{6.74 \pm 0.21}$  copies/L-wastewater ( $31.1 \pm 12.3\%$  recovery rate) and  
296 the solids concentration was  $10^{3.67 \pm 0.37}$  copies/L-wastewater ( $0.03 \pm 0.02\%$  recovery rate).  
297 Differences in recovery rates were in part due to differences in RT-ddPCR inhibition in liquid vs.

298 solid extracts (Figure SI.4). When we diluted our nucleic acid extracts 10x, we observed minimal  
299 inhibitory effects in liquid (inhibition factors of 1.0 - 2.2) as compared to the solids sample  
300 extracts (inhibition factors of 5.7 - 32.4). However, even accounting for differences in inhibition,  
301 the liquid fraction yielded overall higher concentrations of all viruses as compared to the solid  
302 fraction.

303 To assess the partitioning behavior of measles, mumps, and rubella viruses in the liquid  
304 vs. solid fractions of wastewater, we estimated the partition coefficients ( $K_d$ ) using samples  
305 spiked with viral standards.  $K_d$  was calculated as the ratio of  $C_s/C_L$ . We observed the highest  $K_d$   
306 for measles of  $219.1 \pm 99.3$  mL/g, as compared to  $57.5 \pm 38.6$  mL/g for mumps and  $3.4 \pm 2.5$   
307 mL/g for rubella. These  $K_d$  results are lower than those determined in previous studies for other  
308 enveloped RNA viruses, such as SARS-CoV-2, influenza A, RSV, and Zika, in wastewater<sup>55,56</sup>.  
309 One possible reason is that using the PCR inhibitor removal kit minimized the inhibition during  
310 the partitioning experiment of Roldan-Hernandez et al. (2023, 2024)<sup>55,56</sup>, while significant  
311 inhibitory effects were observed in the solids sample extracts in our study. In addition, partition  
312 coefficients and recovery rates vary across different viruses, and also due to numerous other  
313 factors, such as the wastewater matrix, liquid-solid separation methods, and wastewater  
314 processing methods<sup>16,55-58</sup>. Additional research is needed to investigate how these factors impact  
315 the partitioning and recovery of measles, mumps, and rubella in wastewater samples.

316 For all three viruses, viral RNA was enriched in the solids over the liquid fraction of  
317 wastewater on a per mass basis (i.e., gene copies/g of wastewater solids > gene copies/mL of  
318 wastewater liquid). Despite a higher mass of viral RNA in the solids, higher *concentrations* of  
319 viral RNA were measured in the liquid fraction of wastewater. This is because the concentration  
320 of RNA measured in the liquid and solid fraction of a wastewater sample depends on the solids

321 concentration of the wastewater sample in addition to the virus partitioning behavior (Figure 2B).  
322 Concentrations of the viral RNA thus may be enriched in the solid fraction by orders of  
323 magnitude relative to the liquid phase and yet in a given volume of influent wastewater, most of  
324 the viruses are in the liquid phase. In the case of our influent wastewater samples, they contained  
325 a total suspended solids concentration of 316 mg/L-wastewater, and thus it makes sense that  
326 given the  $K_d$  values observed that we were able to more sensitively recover the target viral RNA  
327 in the liquid fraction of the wastewater (see dashed vertical lines on Figure 2B).

328 Inhibitors present in the sample may also drive decisions related to sample processing  
329 methods to improve sensitivity. As noted above, we observed significantly more inhibition in our  
330 solid fraction RNA extracts than liquid fraction extracts. Employing a concentration method that  
331 does not separate liquid and solid fractions, such as Ceres Nanotrap beads<sup>12,59-61</sup> or  
332 electronegative filtration of the entire sample without a prior centrifugation step<sup>24,62,63</sup>, should be  
333 assessed to compare and balance the concentration of target viruses with inhibitors. RT-PCR  
334 inhibitor removal kits should also be explored for improving method sensitivity.

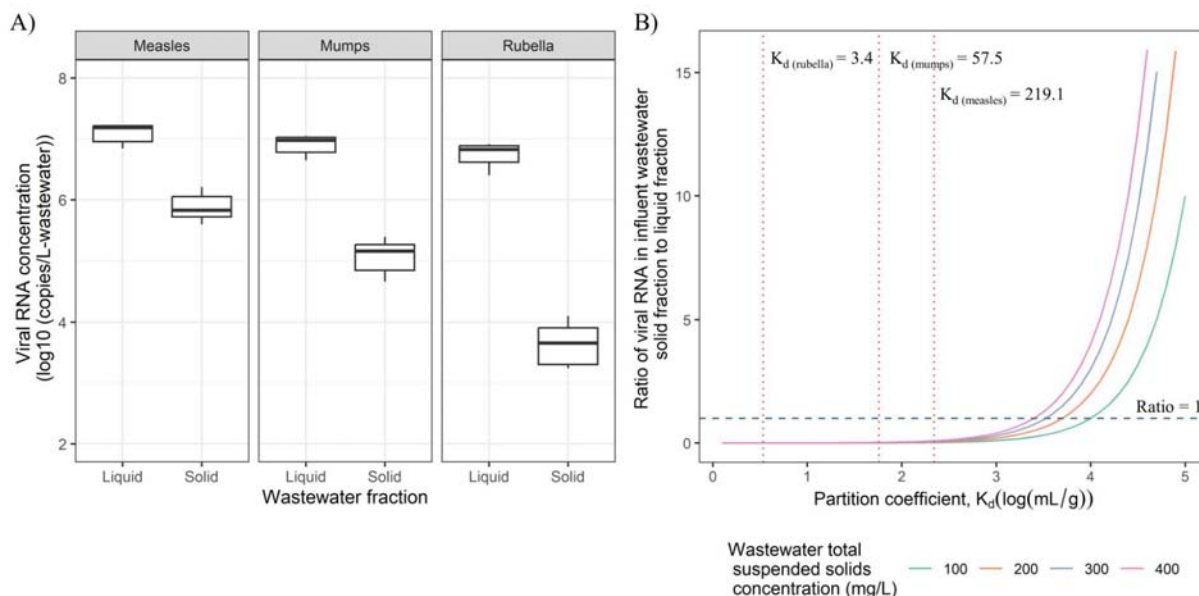

335



336 **Figure 2. Partitioning of measles, mumps, and rubella viral RNA.** (A) Measles, mumps, and  
337 rubella viral RNA concentrations in influent wastewater liquid and solid fractions. Boxplots  
338 show the results generated from 6 replicates of 50mL influent wastewater samples spiked with  
339 viral ATCC standards that were centrifuged and the supernatant (liquid) and pellets (solid) were  
340 processed separately for viral RNA quantification. (B) Impact of virus partition coefficient ( $K_d$ )  
341 and total suspended solids concentration (TSS) in wastewater on relative amount of target viral  
342 RNA in solid vs. liquid fraction. The x-axis represents the log-transformed partition coefficient  
343 (mL/g) and the y-axis represents the ratio of the target viral RNA in the solid to the liquid  
344 fraction of a wastewater sample (viral RNA concentration (copies/L-wastewater) in solid fraction  
345 divided by viral RNA concentration (copies/L-wastewater) in liquid fraction). The blue dashed  
346 line indicates where the abundance of target virus in wastewater solid and liquid fractions are  
347 equal. A greater y-axis value indicates that the target virus is more abundant in wastewater solids  
348 than liquid fraction. Different colored lines represent different wastewater total suspended solids  
349 concentrations. Orange dotted lines indicate the  $K_d$  values of measles, mumps, and rubella  
350 determined in this study.

351

### 352 **3.3. Measles, mumps, and rubella RNA persistence in wastewater**

353 In the measles, mumps, and rubella RNA persistence experiments, we determined the  
354 viral RNA concentration of measles, mumps, and rubella at day 0 to be  $0.25-1.66 \times 10^7$  copies/L-  
355 wastewater for the high-concentration samples and  $0.63-1.59 \times 10^6$  copies/L-wastewater for the  
356 low-concentration samples (Figure 3). A first-order decay model was fit to the viral RNA  
357 concentration measurements over time for all viruses and for each different experimental  
358 condition ( $R^2$  values ranged between 0.72 and 0.98, p-values < 0.001). Details of the initial

359 concentrations, the calculated first-order decay rate constants ( $k$ ),  $T_{90}$ , and the  $R^2$  values for each  
360 viral target and experimental condition are summarized in Table SI.11.

361 When stored at 4°C, limited decay of measles, mumps, and rubella viral RNA was  
362 observed, with less than 90% reduction for all the target viruses and both initial concentrations  
363 over the 28-day test. The decay rate constants were between  $0.050 \pm 0.007$  and  $0.080 \pm 0.013$   
364  $\text{day}^{-1}$ , and the time for one log reduction ( $T_{90}$ ) ranged from 29.3 to 45.7 days. The high-  
365 concentration mumps RNA had the lowest decay rate constant and the highest  $T_{90}$  value, while  
366 the low-concentration measles RNA had the highest decay rate constant and the lowest  $T_{90}$  value.  
367 The measles, mumps, and rubella viral RNA decayed faster in wastewater stored at room  
368 temperature, which ranged from 21°C to 26°C (Figure SI.5). Decay rate constants ranged from  
369  $0.205 \pm 0.011 - 0.452 \pm 0.024 \text{ day}^{-1}$ , with average  $T_{90}$  values of 5.1-11.2 days. The lowest decay  
370 rate constants were observed for mumps RNA, with mean values of 0.205 and 0.253  $\text{day}^{-1}$ , and  
371 the highest decay rate constants were observed for rubella RNA, with mean values of 0.441 and  
372 0.452  $\text{day}^{-1}$ .

373 We observed significantly higher (faster) decay rate constants in the wastewater samples  
374 spiked with the low initial concentration of virus standards compared to the wastewater samples  
375 spiked with the high initial concentration of virus standards for measles at both 4°C and room  
376 temperature and for mumps at room temperature (p-values < 0.05). For measles RNA, the mean  
377  $T_{90}$  value decreased from 40.5 to 29.3 days (27.7% decrease) when the samples were stored at  
378 4°C and from 8.2 to 6.2 days (24.4% decrease) when the samples were stored at room  
379 temperature. For mumps RNA, the mean  $T_{90}$  values decreased from 11.2 to 9.1 days (18.8%  
380 decrease) when the samples were stored at room temperature. No significant differences between  
381 the two viral RNA levels were observed for rubella or when mumps were stored at 4°C. Similar

382 results were also observed by Zhu et al. 2023 when they investigated the persistence of Zika  
383 spiked into wastewater at different initial concentrations, and additional studies are needed to  
384 further investigate viral RNA persistence at low viral concentrations <sup>49</sup>.

385 To the best of our knowledge, this is the first study to report decay kinetics of measles,  
386 mumps, and rubella viral RNA in wastewater. Our results show that measles, mumps, and rubella  
387 RNA decay in wastewater is limited. Similar to other studies that investigated the persistence of  
388 enveloped RNA viruses in wastewater <sup>49,64–68</sup>, we show that the viral RNA decayed significantly  
389 slower in samples stored at a lower temperature. These results also demonstrate the feasibility of  
390 wastewater monitoring of measles, mumps, and rubella viruses, and suggest limited decay of all  
391 viruses ( $T_{90}$  values were  $>5$  days) at room temperature, indicating only minimal loss due to decay  
392 during wastewater transit within a building or facility and also within the sewer system. Our  
393 results also indicate that wastewater samples can be stored at 4°C for up to several weeks without  
394 substantial loss in viral RNA signal. Further studies are needed to investigate measles, mumps,  
395 and rubella RNA persistence during freeze-thaw cycles, at lower initial concentrations, at higher  
396 temperatures, and in different wastewaters that may vary in total suspended solids (TSS)  
397 concentrations, pH, and other water quality parameters.

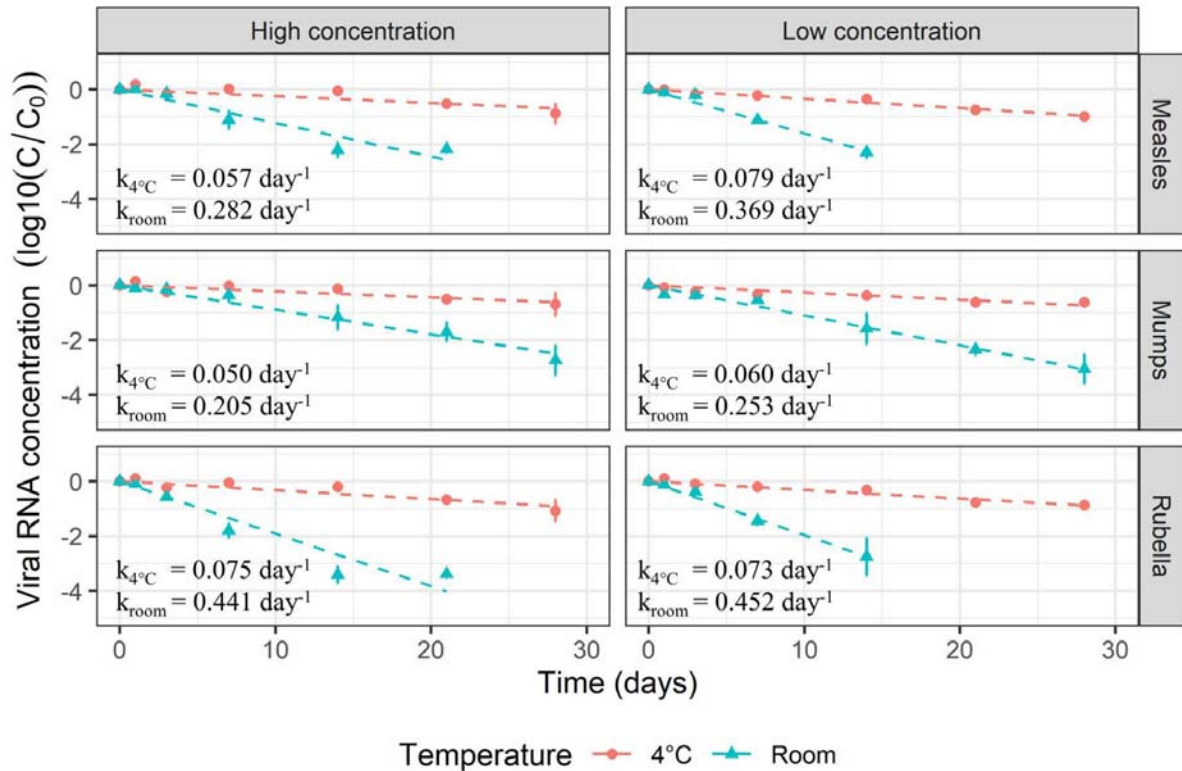

398  
399 **Figure 3. Measles, mumps, and rubella viral RNA persistence in influent wastewater over**  
400 **28 days.** The x-axis indicates the day of the persistence experiment. The y-axis indicates the  
401 normalized target RNA concentration ( $\log_{10}(C/C_0)$ , where  $C$  is the target RNA concentration on  
402 the measurement day and  $C_0$  is the concentration on day 0. Points and error bars indicate the  
403 mean values and standard deviations of the viral RNA concentrations from triplicate samples.  
404 Dashed lines show the fitted linear regression. First-order decay rate constants ( $k$ ) are shown for  
405 each target viral RNA. Samples with no positive droplets in two or more of the triplicates were  
406 excluded.

407  
408 Our study supports the use of wastewater monitoring for population-level surveillance of  
409 three vaccine-preventable diseases: measles, mumps, and rubella. We developed and validated  
410 multiplexed RT-ddPCR assays for the detection of wild type and vaccine measles strains,

411 mumps, and rubella. We estimated partition coefficients for each virus in influent wastewater  
412 samples and showed that the viral RNA was enriched in the solid fraction relative to the liquid  
413 and yet given the low solids content, assaying the liquid fraction yielded more sensitive detection  
414 of the viruses. Finally, we measured the persistence of the viral RNA in wastewater samples at  
415 room temperature and 4°C and show that limited decay of the viral targets is expected over time  
416 scales relevant to sewage transit and storage. Together these findings suggest that wastewater  
417 monitoring for these vaccine-preventable diseases is feasible to integrate into existing routine  
418 wastewater surveillance systems. While cases of measles are still rare in the U.S., measles  
419 remains endemic in several other countries. With vaccination rates below those needed for herd  
420 immunity, cases of measles are on the rise and improved surveillance may be critical for early  
421 detection and assessing the extent and progression of an outbreak. Detections of these viruses  
422 can be used to dispatch and target immunization clinics and communication efforts to encourage  
423 vaccination.

424 We recommend several areas of further research on wastewater monitoring for measles  
425 mumps, and rubella viruses. First, we need validated assays that can distinguish between wild  
426 type and vaccine strains of mumps and rubella in addition to measles. We focused on measles  
427 due to the urgency from recent outbreaks. Second, studies on shedding of measles, mumps, and  
428 rubella viruses both during infection and after vaccination are needed to understand and model  
429 expected concentrations in wastewater and assess the sensitivity of wastewater monitoring for  
430 detecting cases in communities. Third, we need studies that compare monitoring at facilities to  
431 downstream wastewater treatment plants. Fourth, methods for improving the recovery of  
432 endogenous target viruses are needed. Fifth, studies on viral persistence as a function of different  
433 wastewater quality parameters and storage conditions (e.g., freeze/thaw) are needed to optimize

434 sampling and laboratory methods. And finally, sequencing of wastewater viral targets should be  
435 explored for tracking disease transmission using genomic epidemiology.

436

#### 437 **Acknowledgments**

438 This research was supported by funds from the Centers for Disease Control and Prevention  
439 (NI50CK000557) and the Houston Health Department. We thank Kaavya Domakonda, Rebecca  
440 Schneider, and Anthony Mulenga at the Houston Health Department and Houston Water for their  
441 assistance in sample collection. We also thank Dolores Sanchez Gonzalez and Michael Secreto  
442 for collecting and sending wastewater samples and an insightful conversation. We thank Lily  
443 Metsker for her help with literature review. The graphical abstract was created with  
444 Biorender.com.

445

#### 446 **Author Contributions**

447 **Jingjing Wu:** Data curation, Investigation, Visualization, Writing-original draft, Writing-review  
448 & editing

449 **Michael X. Wang:** Methodology, Visualization, Writing-original draft

450 **Prashant Kalvapalle:** Methodology, Visualization, Writing-original draft

451 **Michael Nute:** Methodology

452 **Todd Treangen:** Methodology, Funding acquisition, Supervision, Writing-review & editing

453 **Katherine Ensor:** Conceptualization, Funding acquisition, Supervision, Methodology, Writing-  
454 review & editing

455 **Loren Hopkins:** Conceptualization, Funding acquisition, Supervision, Writing-review & editing

456 **Rachel Poretsky:** Methodology, Writing-review & editing

457 **Lauren B. Stadler (Corresponding Author):** Conceptualization, Funding acquisition, Project  
458 administration, Supervision, Writing-original draft, Writing-review & editing

459

460

461 **References**

- 462 1 P. Gahlot, K. D. Alley, S. Arora, S. Das, A. Nag and V. K. Tyagi, Wastewater surveillance  
463 could serve as a pandemic early warning system for COVID-19 and beyond, *WIREs*  
464 *Water*, 2023, **10**, e1650.
- 465 2 B. Kasprzyk-Hordern, B. Adams, I. D. Adewale, F. O. Agunbiade, M. I. Akinyemi, E.  
466 Archer, F. A. Badru, J. Barnett, I. J. Bishop, M. Di Lorenzo, P. Estrela, J. Faraway, M. J.  
467 Fasona, S. A. Fayomi, E. J. Feil, L. J. Hyatt, A. T. Irewale, T. Kjeldsen, A. K. S. Lasisi, S.  
468 Loiselle, T. M. Louw, B. Metcalfe, S. A. Nmormah, T. O. Oluseyi, T. R. Smith, M. C.  
469 Snyman, T. O. Sogbanmu, D. Stanton-Fraser, S. Surujlal-Naicker, P. R. Wilson, G.  
470 Wolfaardt and C. O. Yinka-Banjo, Wastewater-based epidemiology in hazard forecasting  
471 and early-warning systems for global health risks, *Environ. Int.*, 2022, **161**, 107143.
- 472 3 M. Kumar, G. Jiang, A. Kumar Thakur, S. Chatterjee, T. Bhattacharya, S. Mohapatra, T.  
473 Chaminda, V. Kumar Tyagi, M. Vithanage, P. Bhattacharya, L. D. Nghiem, D. Sarkar, C.  
474 Sonne and J. Mahlknecht, Lead time of early warning by wastewater surveillance for  
475 COVID-19: Geographical variations and impacting factors, *Chem. Eng. J.*, 2022, **441**,  
476 135936.
- 477 4 E. Róka, B. Khayer, Z. Kis, L. B. Kovács, E. Schuler, N. Magyar, T. Málnási, O. Oravec, B.  
478 Pályi, T. Pándics and M. Vargha, Ahead of the second wave: Early warning for COVID-19  
479 by wastewater surveillance in Hungary, *Sci. Total Environ.*, 2021, **786**, 147398.
- 480 5 M. Assoum, C. L. Lau, P. K. Thai, W. Ahmed, J. F. Mueller, K. V. Thomas, P. M. Choi, G.  
481 Jackson and L. A. Selvey, Wastewater Surveillance Can Function as an Early Warning  
482 System for COVID-19 in Low-Incidence Settings, *Trop. Med. Infect. Dis.*, 2023, **8**, 211.
- 483 6 D. Panchal, O. Prakash, P. Bobde and S. Pal, SARS-CoV-2: sewage surveillance as an  
484 early warning system and challenges in developing countries, *Environ. Sci. Pollut. Res.*,  
485 2021, **28**, 22221–22240.
- 486 7 M. D. Parkins, B. E. Lee, N. Acosta, M. Bautista, C. R. J. Hubert, S. E. Hruday, K.  
487 Frankowski and X.-L. Pang, Wastewater-based surveillance as a tool for public health  
488 action: SARS-CoV-2 and beyond, *Clin. Microbiol. Rev.*, 2023, **0**, e00103-22.
- 489 8 J. R. Thompson, Y. V. Nancharaiyah, X. Gu, W. L. Lee, V. B. Rajal, M. B. Haines, R. Girones,  
490 L. C. Ng, E. J. Alm and S. Wuertz, Making waves: Wastewater surveillance of SARS-CoV-2  
491 for population-based health management, *Water Res.*, 2020, **184**, 116181.
- 492 9 G. Medema, F. Been, L. Heijnen and S. Petterson, Implementation of environmental  
493 surveillance for SARS-CoV-2 virus to support public health decisions: Opportunities and  
494 challenges, *Curr. Opin. Environ. Sci. Health*, 2020, **17**, 49–71.
- 495 10J. Oghuan, C. Chavarria, S. R. Vanderwal, A. Gitter, A. A. Ojaruega, C. Monserrat, C. X.  
496 Bauer, E. L. Brown, S. J. Cregeen, J. Deegan, B. M. Hanson, M. Tisza, H. I. Ocaranza, J.  
497 Balliew, A. W. Maresso, J. Rios, E. Boerwinkle, K. D. Mena and F. Wu, 2023,  
498 2023.05.28.23290658.
- 499 11Y. Wang, P. Liu, J. VanTassell, S. P. Hilton, L. Guo, O. Sablon, M. Wolfe, L. Freeman, W.  
500 Rose, C. Holt, M. Browning, M. Bryan, L. Waller, P. F. M. Teunis and C. L. Moe, When  
501 case reporting becomes untenable: Can sewer networks tell us where COVID-19  
502 transmission occurs?, *Water Res.*, 2023, **229**, 119516.

- 503 12K. Brighton, S. Fisch, H. Wu, K. Vigil and T. G. Aw, Targeted community wastewater  
504 surveillance for SARS-CoV-2 and Mpox virus during a festival mass-gathering event, *Sci.*  
505 *Total Environ.*, 2024, **906**, 167443.
- 506 13T. de Melo, G. Islam, D. B. D. Simmons, J.-P. Desaulniers and A. E. Kirkwood, An  
507 alternative method for monitoring and interpreting influenza A in communities using  
508 wastewater surveillance, *Front. Public Health*, 2023, **11**, 1141136.
- 509 14B. A. Layton, D. Kaya, C. Kelly, K. J. Williamson, D. Alegre, S. M. Bachhuber, P. G.  
510 Banwarth, J. W. Bethel, K. Carter, B. D. Dalziel, M. Dasenko, M. Geniza, A. George, A.-M.  
511 Girard, R. Haggerty, K. A. Higley, D. M. Hynes, J. Lubchenco, K. R. McLaughlin, F. J. Nieto,  
512 A. Noakes, M. Peterson, A. D. Piemonti, J. L. Sanders, B. M. Tyler and T. S. Radniecki,  
513 Evaluation of a Wastewater-Based Epidemiological Approach to Estimate the  
514 Prevalence of SARS-CoV-2 Infections and the Detection of Viral Variants in Disparate  
515 Oregon Communities at City and Neighborhood Scales, *Environ. Health Perspect.*,  
516 2022, **130**, 067010.
- 517 15S. Karthikeyan, N. Ronquillo, P. Belda-Ferre, D. Alvarado, T. Javidi, C. A. Longhurst and  
518 R. Knight, High-Throughput Wastewater SARS-CoV-2 Detection Enables Forecasting of  
519 Community Infection Dynamics in San Diego County, *mSystems*, 2021, **6**,  
520 10.1128/msystems.00045-21.
- 521 16E. Mercier, P. M. D'Aoust, O. Thakali, N. Hegazy, J.-J. Jia, Z. Zhang, W. Eid, J. Plaza-Diaz,  
522 M. P. Kabir, W. Fang, A. Cowan, S. E. Stephenson, L. Pisharody, A. E. MacKenzie, T. E.  
523 Graber, S. Wan and R. Delatolla, Municipal and neighbourhood level wastewater  
524 surveillance and subtyping of an influenza virus outbreak, *Sci. Rep.*, 2022, **12**, 15777.
- 525 17P. M. D'Aoust, E. Mercier, D. Montpetit, J.-J. Jia, I. Alexandrov, N. Neault, A. T. Baig, J.  
526 Mayne, X. Zhang, T. Alain, M.-A. Langlois, M. R. Servos, M. MacKenzie, D. Figeys, A. E.  
527 MacKenzie, T. E. Graber and R. Delatolla, Quantitative analysis of SARS-CoV-2 RNA from  
528 wastewater solids in communities with low COVID-19 incidence and prevalence, *Water*  
529 *Res.*, 2021, **188**, 116560.
- 530 18B. Hughes, D. Duong, B. J. White, K. R. Wigginton, E. M. G. Chan, M. K. Wolfe and A. B.  
531 Boehm, Respiratory Syncytial Virus (RSV) RNA in Wastewater Settled Solids Reflects  
532 RSV Clinical Positivity Rates, *Environ. Sci. Technol. Lett.*, 2022, **9**, 173–178.
- 533 19Y. Ai, A. Davis, D. Jones, S. Lemeshow, H. Tu, F. He, P. Ru, X. Pan, Z. Bohrerova and J.  
534 Lee, Wastewater SARS-CoV-2 monitoring as a community-level COVID-19 trend tracker  
535 and variants in Ohio, United States, *Sci. Total Environ.*, 2021, **801**, 149757.
- 536 20B. Kasprzyk-Hordern, N. Sims, K. Farkas, K. Jagadeesan, K. Proctor, M. J. Wade and D. L.  
537 Jones, Wastewater-based epidemiology for comprehensive community health  
538 diagnostics in a national surveillance study: Mining biochemical markers in wastewater,  
539 *J. Hazard. Mater.*, 2023, **450**, 130989.
- 540 21M. K. Wolfe, A. T. Yu, D. Duong, M. S. Rane, B. Hughes, V. Chan-Herur, M. Donnelly, S.  
541 Chai, B. J. White, D. J. Vugia and A. B. Boehm, Use of Wastewater for Mpox Outbreak  
542 Surveillance in California, *N. Engl. J. Med.*, 2023, **388**, 570–572.
- 543 22J. Crowe, A. T. Schnaubelt, S. SchmidtBonne, K. Angell, J. Bai, T. Eske, M. Nicklin, C.  
544 Pratt, B. White, B. Crofts-Hannibal, N. Staffend, V. Herrera, J. Cobb, J. Conner, J.  
545 Carstens, J. Tempero, L. Bouda, M. Ray, J. V. Lawler, W. S. Campbell, J.-M. Lowe, J.  
546 Santarpia, S. Bartelt-Hunt, M. Wiley, D. Brett-Major, C. Logan and M. J. Broadhurst,



- 547 Assessment of a Program for SARS-CoV-2 Screening and Environmental Monitoring in an  
548 Urban Public School District, *JAMA Netw. Open*, 2021, **4**, e2126447.
- 549 23R. Fielding-Miller, S. Karthikeyan, T. Gaines, R. S. Garfein, R. A. Salido, V. J. Cantu, L.  
550 Kohn, N. K. Martin, A. Wynn, C. Wijaya, M. Flores, V. Omaleki, A. Majnoonian, P.  
551 Gonzalez-Zuniga, M. Nguyen, A. V. Vo, T. Le, D. Duong, A. Hassani, S. Tweeten, K.  
552 Jepsen, B. Henson, A. Hakim, A. Birmingham, P. D. Hoff, A. M. Mark, C. A. Nasamran, S.  
553 B. Rosenthal, N. Moshiri, K. M. Fisch, G. Humphrey, S. Farmer, H. M. Tubb, T. Valles, J.  
554 Morris, J. Kang, B. Khaleghi, C. Young, A. D. Akel, S. Eilert, J. Eno, K. Curewitz, L. C.  
555 Laurent, T. Rosing, R. Knight, N. A. Baer, T. Barber, A. Castro-Martinez, M. Chacón, W.  
556 Cheung, E. S. Crescini, E. R. Eisner, L. F. Vargas, A. Hakim, C. Hobbs, A. L. Lastrella, E.  
557 S. Lawrence, N. L. Matteson, K. Gangavarapu, T. T. Ngo, P. Seaver, E. W. Smoot, R. Tsai,  
558 B. Xia, S. Aigner, C. Anderson, P. Belda-Ferre, S. Sathe, M. Zeller, K. G. Andersen, G. W.  
559 Yeo and E. Kurzban, Safer at school early alert: an observational study of wastewater  
560 and surface monitoring to detect COVID-19 in elementary schools, *Lancet Reg. Health –*  
561 *Am.*, , DOI:10.1016/j.lana.2023.100449.
- 562 24C. Gibas, K. Lambirth, N. Mittal, M. A. I. Juel, V. B. Barua, L. Roppolo Brazell, K. Hinton, J.  
563 Lontai, N. Stark, I. Young, C. Quach, M. Russ, J. Kauer, B. Nicolosi, D. Chen, S. Akella, W.  
564 Tang, J. Schlueter and M. Munir, Implementing building-level SARS-CoV-2 wastewater  
565 surveillance on a university campus, *Sci. Total Environ.*, 2021, **782**, 146749.
- 566 25S. Kennedy and A. Spaulding, Four Models of Wastewater-Based Surveillance for SARS-  
567 CoV-2 in Jail Settings: How Monitoring Wastewater Complements Individual Screening,  
568 *medRxiv*, 2023, 2023.08.04.23293152.
- 569 26B. A. Petros, J. S. Paull, C. H. Tomkins-Tinch, B. C. Loftness, K. C. DeRuff, P. Nair, G. L.  
570 Gionet, A. Benz, T. Brock-Fisher, M. Hughes, L. Yurkovetskiy, S. Mulaudzi, E. Leenerman,  
571 T. Nyalile, G. K. Moreno, I. Specht, K. Sani, G. Adams, S. V. Babet, E. Baron, J. T. Blank, C.  
572 Boehm, Y. Botti-Lodovico, J. Brown, A. R. Buisker, T. Burcham, L. Chylek, P. Cronan, A.  
573 Dauphin, V. Desreumaux, M. Doss, B. Flynn, A. Gladden-Young, O. Glennon, H. D.  
574 Harmon, T. V. Hook, A. Kary, C. King, C. Loreth, L. Marrs, K. J. McQuade, T. T. Milton, J. M.  
575 Mulford, K. Oba, L. Pearlman, M. Schifferli, M. J. Schmidt, G. M. Tandus, A. Tyler, M. E.  
576 Vodzak, K. K. Bevill, A. Colubri, B. L. MacInnis, A. Z. Ozsoy, E. Parrie, K. Sholtes, K. J.  
577 Siddle, B. Fry, J. Luban, D. J. Park, J. Marshall, A. Bronson, S. F. Schaffner and P. C.  
578 Sabeti, Multimodal surveillance of SARS-CoV-2 at a university enables development of a  
579 robust outbreak response framework, *Med*, 2022, **3**, 883-900.e13.
- 580 27L. C. Scott, A. Aubee, L. Babahaji, K. Vigil, S. Tims and T. G. Aw, Targeted wastewater  
581 surveillance of SARS-CoV-2 on a university campus for COVID-19 outbreak detection  
582 and mitigation, *Environ. Res.*, 2021, **200**, 111374.
- 583 28R. R. Spurbeck, A. Minard-Smith and L. Catlin, Feasibility of neighborhood and building  
584 scale wastewater-based genomic epidemiology for pathogen surveillance, *Sci. Total*  
585 *Environ.*, 2021, **789**, 147829.
- 586 29V. Vo, A. Harrington, C.-L. Chang, H. Baker, M. A. Moshi, N. Ghani, J. Y. Itorralba, R. L.  
587 Tillett, E. Dahlmann, N. Basazinew, R. Gu, T. D. Familiara, S. Boss, F. Vanderford, M.  
588 Ghani, A. J. Tang, A. Matthews, K. Papp, E. Khan, C. Koutras, H.-Y. Kan, C. Lockett, D.  
589 Gerrity and E. C. Oh, Identification and genome sequencing of an influenza H3N2 variant

- 590 in wastewater from elementary schools during a surge of influenza A cases in Las Vegas,  
591 Nevada, *Sci. Total Environ.*, 2023, **872**, 162058.
- 592 30M. K. Wolfe, D. Duong, K. M. Bakker, M. Ammerman, L. Mortenson, B. Hughes, P. Arts, A.  
593 S. Luring, W. J. Fitzsimmons, E. Bendall, C. E. Hwang, E. T. Martin, B. J. White, A. B.  
594 Boehm and K. R. Wigginton, Wastewater-Based Detection of Two Influenza Outbreaks,  
595 *Environ. Sci. Technol. Lett.*, 2022, **9**, 687–692.
- 596 31M. Wolken, T. Sun, C. McCall, R. Schneider, K. Caton, C. Hundley, L. Hopkins, K. Ensor,  
597 K. Domakonda, P. Kalvapalle, D. Persse, S. Williams and L. B. Stadler, Wastewater  
598 surveillance of SARS-CoV-2 and influenza in preK-12 schools shows school,  
599 community, and citywide infections, *Water Res.*, 2023, **231**, 119648.
- 600 32WHO, Measles, <https://www.who.int/news-room/fact-sheets/detail/measles>,  
601 (accessed 17 May 2024).
- 602 33D. Kanbayashi, T. Kurata, A. Kaida, H. Kubo, S. P. Yamamoto, K. Egawa, Y. Hirai, K.  
603 Okada, Y. Kaida, R. Ikemori, T. Yumisashi, A. Ito, T. Saito, Y. Yamaji, Y. Nishino, R. Omori,  
604 H. Mori, K. Motomura and K. Ikuta, Shedding of rubella virus in postsymptomatic  
605 individuals; viral RNA load is a potential indicator to estimate candidate patients  
606 excreting infectious rubella virus, *J. Clin. Virol.*, 2023, **160**, 105377.
- 607 34S. Gouma, S. J. M. Hahné, D. B. Gijssels, M. P. G. Koopmans and R. S. van Binnendijk,  
608 Severity of mumps disease is related to MMR vaccination status and viral shedding,  
609 *Vaccine*, 2016, **34**, 1868–1873.
- 610 35R. S. van Binnendijk, S. van den Hof, H. van den Kerkhof, R. H. G. Kohl, F. Woonink, G. A.  
611 M. Berbers, M. A. E. Conyn-van Spaendonck and T. G. Kimman, Evaluation of Serological  
612 and Virological Tests in the Diagnosis of Clinical and Subclinical Measles Virus  
613 Infections during an Outbreak of Measles in The Netherlands, *J. Infect. Dis.*, 2003, **188**,  
614 898–903.
- 615 36M. J. Broadhurst, N. Garamani, Z. Hahn, B. Jiang, J. Weber, C. Huang, M. K. Sahoo, J.  
616 Kurzer, C. A. Hogan and B. A. Pinsky, Evaluation of a measles virus multiplex, triple-  
617 target real-time RT-PCR in three specimen matrices at a U.S. academic medical center,  
618 *J. Clin. Virol.*, 2021, **136**, 104757.
- 619 37K. S. M. Benschop, H. G. van der Avoort, E. Jusic, H. Vennema, R. van Binnendijk and E.  
620 Duizer, Polio and Measles Down the Drain: Environmental Enterovirus Surveillance in  
621 the Netherlands, 2005 to 2015, *Appl. Environ. Microbiol.*, 2017, **83**, e00558-17.
- 622 38K. Bibby and J. Peccia, Identification of viral pathogen diversity in sewage sludge by  
623 metagenome analysis, *Environ. Sci. Technol.*, 2013, **47**, 1945–1951.
- 624 39C. McCall, H. Wu, B. Miyani and I. Xagorarakis, Identification of multiple potential viral  
625 diseases in a large urban center using wastewater surveillance, *Water Res.*, 2020, **184**,  
626 116160.
- 627 40A. Rector, M. Bloemen, B. Hoorelbeke, M. V. Ranst and E. Wollants, 2024,  
628 2024.04.08.24305478.
- 629 41F. Armas, F. Chandra, W. L. Lee, X. Gu, H. Chen, A. Xiao, M. Leifels, S. Wuertz, E. J. Alm  
630 and J. Thompson, Contextualizing Wastewater-Based surveillance in the COVID-19  
631 vaccination era, *Environ. Int.*, 2023, **171**, 107718.
- 632 42B. Kaic, I. Gjenero-Margan, B. Aleraj, T. Vilibić-Čavlek, M. Santak, A. Cvitković, T.  
633 Nemeth-Blazic and I. I. Hofman, Spotlight on measles 2010: Excretion of vaccine strain

- 634 measles virus in urine and pharyngeal secretions of a child with vaccine associated  
635 febrile rash illness, Croatia, March 2010, *Eurosurveillance*, 2010, **15**, 19652.
- 636 43P. A. Rota, A. S. Khan, E. Durigon, T. Yuran, Y. S. Villamarzo and W. J. Bellini, Detection of  
637 measles virus RNA in urine specimens from vaccine recipients, *J. Clin. Microbiol.*, 1995,  
638 **33**, 2485–2488.
- 639 44C. Camacho, G. Coulouris, V. Avagyan, N. Ma, J. Papadopoulos, K. Bealer and T. L.  
640 Madden, BLAST+: architecture and applications, *BMC Bioinformatics*, 2009, **10**, 421.
- 641 45K. Katoh, J. Rozewicki and K. D. Yamada, MAFFT online service: multiple sequence  
642 alignment, interactive sequence choice and visualization, *Brief. Bioinform.*, 2019, **20**,  
643 1160–1166.
- 644 46I. Letunic and P. Bork, Interactive Tree of Life (iTOL) v6: recent updates to the  
645 phylogenetic tree display and annotation tool, *Nucleic Acids Res.*, 2024, gkae268.
- 646 47E. G. Lou, N. Sapoval, C. McCall, L. Bauhs, R. Carlson-Stadler, P. Kalvapalle, Y. Lai, K.  
647 Palmer, R. Penn, W. Rich, M. Wolken, P. Brown, K. B. Ensor, L. Hopkins, T. J. Treangen  
648 and L. B. Stadler, Direct comparison of RT-ddPCR and targeted amplicon sequencing for  
649 SARS-CoV-2 mutation monitoring in wastewater, *Sci. Total Environ.*, 2022, **833**, 155059.
- 650 48M. A. Borchardt, A. B. Boehm, M. Salit, S. K. Spencer, K. R. Wigginton and R. T. Noble,  
651 The Environmental Microbiology Minimum Information (EMMI) Guidelines: qPCR and  
652 dPCR Quality and Reporting for Environmental Microbiology, *Environ. Sci. Technol.*,  
653 2021, **55**, 10210–10223.
- 654 49K. Zhu, C. Hill, A. Muirhead, M. Basu, J. Brown, M. A. Brinton, M. J. Hayat, C. Venegas-  
655 Vargas, M. G. Reis, A. Casanovas-Massana, J. S. Meschke, A. I. Ko, F. Costa and C. E.  
656 Stauber, Zika virus RNA persistence and recovery in water and wastewater: An approach  
657 for Zika virus surveillance in resource-constrained settings, *Water Res.*, 2023, **241**,  
658 120116.
- 659 50E. K. Hayes, M. T. Gouthro, J. J. LeBlanc and G. A. Gagnon, Simultaneous detection of  
660 SARS-CoV-2, influenza A, respiratory syncytial virus, and measles in wastewater by  
661 multiplex RT-qPCR, *Sci. Total Environ.*, 2023, **889**, 164261.
- 662 51K. B. Hummel, L. Lowe, W. J. Bellini and P. A. Rota, Development of quantitative gene-  
663 specific real-time RT-PCR assays for the detection of measles virus in clinical  
664 specimens, *J. Virol. Methods*, 2006, **132**, 166–173.
- 665 52F. Roy, L. Mendoza, J. Hiebert, R. J. McNall, B. Bankamp, S. Connolly, A. Lüdde, N.  
666 Friedrich, A. Mankertz, P. A. Rota and A. Severini, Rapid Identification of Measles Virus  
667 Vaccine Genotype by Real-Time PCR, *J. Clin. Microbiol.*, 2017, **55**, 735–743.
- 668 53V. Rowlands, A. J. Rutkowski, E. Meuser, T. H. Carr, E. A. Harrington and J. C. Barrett,  
669 Optimisation of robust singleplex and multiplex droplet digital PCR assays for high  
670 confidence mutation detection in circulating tumour DNA, *Sci. Rep.*, 2019, **9**, 12620.
- 671 54D. Schleinitz, J. K. DiStefano and P. Kovacs, in *Disease Gene Identification: Methods and*  
672 *Protocols*, ed. J. K. DiStefano, Humana Press, Totowa, NJ, 2011, pp. 77–87.
- 673 55L. Roldan-Hernandez, C. V. Oost and A. B. Boehm, Solid–liquid partitioning of dengue,  
674 West Nile, Zika, hepatitis A, influenza A, and SARS-CoV-2 viruses in wastewater from  
675 across the USA, *Environ. Sci. Water Res. Technol.*, , DOI:10.1039/D4EW00225C.

- 676 56L. Roldan-Hernandez and A. B. Boehm, Adsorption of Respiratory Syncytial Virus,  
677 Rhinovirus, SARS-CoV-2, and F+ Bacteriophage MS2 RNA onto Wastewater Solids from  
678 Raw Wastewater, *Environ. Sci. Technol.*, 2023, **57**, 13346–13355.
- 679 57P. R. Breadner, H. A. Dhiyebi, A. Fattahi, N. Srikanthan, S. Hayat, M. G. Aucoin, S. J.  
680 Boegel, L. M. Bragg, P. M. Craig, Y. Xie, J. P. Giesy and M. R. Servos, A comparative  
681 analysis of the partitioning behaviour of SARS-CoV-2 RNA in liquid and solid fractions of  
682 wastewater, *Sci. Total Environ.*, 2023, **895**, 165095.
- 683 58M. F. Espinosa, M. E. Verbyla, L. Vassalle, C. Leal, D. Leroy-Freitas, E. Machado, L.  
684 Fernandes, A. T. Rosa-Machado, J. Calábria, C. Chernicharo and C. R. Mota Filho,  
685 Reduction and liquid-solid partitioning of SARS-CoV-2 and adenovirus throughout the  
686 different stages of a pilot-scale wastewater treatment plant, *Water Res.*, 2022, **212**,  
687 118069.
- 688 59W. Ahmed, A. Bivins, A. Korajkic, S. Metcalfe, W. J. M. Smith and S. L. Simpson,  
689 Comparative analysis of Adsorption-Extraction (AE) and Nanotrap® Magnetic Virus  
690 Particles (NMVP) workflows for the recovery of endogenous enveloped and non-  
691 enveloped viruses in wastewater, *Sci. Total Environ.*, 2023, **859**, 160072.
- 692 60M. Jiang, A. L. W. Wang, N. A. Be, N. Mulakken, K. L. Nelson and R. S. Kantor, Evaluation  
693 of the Impact of Concentration and Extraction Methods on the Targeted Sequencing of  
694 Human Viruses from Wastewater, *Environ. Sci. Technol.*, 2024, **58**, 8239–8250.
- 695 61P. Liu, L. Guo, M. Cavallo, C. Cantrell, S. P. Hilton, A. Nguyen, A. Long, J. Dunbar, R.  
696 Barbero, R. Barclay, O. Sablon, M. Wolfe, B. Lepene and C. Moe, Comparison of  
697 Nanotrap® Microbiome A Particles, membrane filtration, and skim milk workflows for  
698 SARS-CoV-2 concentration in wastewater, *Front. Microbiol.*, ,  
699 DOI:10.3389/fmicb.2023.1215311.
- 700 62W. Ahmed, P. M. Bertsch, A. Bivins, K. Bibby, K. Farkas, A. Gathercole, E. Haramoto, P.  
701 Gyawali, A. Korajkic, B. R. McMinn, J. F. Mueller, S. L. Simpson, W. J. M. Smith, E. M.  
702 Symonds, K. V. Thomas, R. Verhagen and M. Kitajima, Comparison of virus  
703 concentration methods for the RT-qPCR-based recovery of murine hepatitis virus, a  
704 surrogate for SARS-CoV-2 from untreated wastewater, *Sci. Total Environ.*, 2020, **739**,  
705 139960.
- 706 63M. Ciesielski, D. Blackwood, T. Clerkin, R. Gonzalez, H. Thompson, A. Larson and R.  
707 Noble, Assessing sensitivity and reproducibility of RT-ddPCR and RT-qPCR for the  
708 quantification of SARS-CoV-2 in wastewater, *J. Virol. Methods*, 2021, **297**, 114230.
- 709 64W. Ahmed, P. M. Bertsch, K. Bibby, E. Haramoto, J. Hewitt, F. Huygens, P. Gyawali, A.  
710 Korajkic, S. Riddell, S. P. Sherchan, S. L. Simpson, K. Sirikanthana, E. M. Symonds, R.  
711 Verhagen, S. S. Vasan, M. Kitajima and A. Bivins, Decay of SARS-CoV-2 and surrogate  
712 murine hepatitis virus RNA in untreated wastewater to inform application in wastewater-  
713 based epidemiology, *Environ. Res.*, 2020, **191**, 110092.
- 714 65F. Chandra, W. L. Lee, F. Armas, M. Leifels, X. Gu, H. Chen, S. Wuertz, E. J. Alm and J.  
715 Thompson, Persistence of Dengue (Serotypes 2 and 3), Zika, Yellow Fever, and Murine  
716 Hepatitis Virus RNA in Untreated Wastewater, *Environ. Sci. Technol. Lett.*, 2021, **8**, 785–  
717 791.
- 718 66A.-M. Hokajärvi, A. Rytönen, A. Tiwari, A. Kauppinen, S. Oikarinen, K.-M. Lehto, A.  
719 Kankaanpää, T. Gunnar, H. Al-Hello, S. Blomqvist, I. T. Miettinen, C. Savolainen-Kopra

720 and T. Pitkänen, The detection and stability of the SARS-CoV-2 RNA biomarkers in  
721 wastewater influent in Helsinki, Finland, *Sci. Total Environ.*, 2021, **770**, 145274.  
722 67A. Muirhead, K. Zhu, J. Brown, M. Basu, M. A. Brinton, F. Costa, M. J. Hayat and C. E.  
723 Stauber, Zika Virus RNA Persistence in Sewage, *Environ. Sci. Technol. Lett.*, 2020, **7**,  
724 659–664.  
725 68A. I. Silverman and A. B. Boehm, Systematic Review and Meta-Analysis of the  
726 Persistence of Enveloped Viruses in Environmental Waters and Wastewater in the  
727 Absence of Disinfectants, *Environ. Sci. Technol.*, 2021, **55**, 14480–14493.  
728
